# Supplementary material for: Uniform NH4TiOF3mesocrystals prepared by an ambient temperature self-assembly process and their topotaxial conversion to anatase
Source: Royal Society of Chemistry journal article supplement (doi:10.1039/b611476h), 2006-10-17
Supplement: b611476h.pdf [file b611476h.pdf]

## Electronic Supporting Information

**Table A:** X-ray diffraction data for as-prepared  $\text{NH}_4\text{TiOF}_3$  using Brij 58

| <i>*Previously reported</i> |                             |            |            | <i>Present study</i> |                             |            |
|-----------------------------|-----------------------------|------------|------------|----------------------|-----------------------------|------------|
| <i>d-spacing</i>            | <i>2<math>\theta</math></i> | <i>l/o</i> | <i>hkl</i> | <i>d-spacing</i>     | <i>2<math>\theta</math></i> | <i>l/o</i> |
| 6.30                        | 14.1                        | 100        | 002        | 6.30                 | 14.1                        | 100        |
| 3.78                        | 23.5                        | 62         | 020        | 3.78                 | 23.5                        | 55.5       |
| 3.24                        | 27.5                        | 60         | 002        | 3.24                 | 27.5                        | 62.7       |
| 3.15                        | 28.3                        | 21         | 004        | 3.15                 | 28.3                        | 21.8       |
| 2.71                        | 33.0                        | 6          | 114        | 2.71                 | 33.0                        | 4.3        |
| 2.67                        | 33.6                        | 18         | 220        | 2.67                 | 33.6                        | 18.8       |
| 2.39                        | 37.7                        | 3          | 105        | 2.42                 | 37.1                        | 2.2        |
| 2.37                        | 37.9                        | 3          | 310        |                      |                             |            |
| 2.34                        | 38.5                        | 7          | 311        | 2.33                 | 38.5                        | 7.2        |
| 2.30                        | 39.1                        | 7          | 124        | 2.30                 | 39.1                        | 6.4        |
| 2.24                        | 40.3                        | 7          | 132        | 2.24                 | 40.3                        | 4.7        |
| 2.10                        | 43.1                        | 11         | 025        | 2.10                 | 43.0                        | 11.0       |
| 1.99                        | 45.6                        | 5          | 232        | 1.99                 | 45.6                        | 4.4        |
| 1.95                        | 46.5                        | 4          | 116        | 1.95                 | 46.5                        | 1.9        |
| 1.90                        | 48.0                        | 11         | 040        | 1.89                 | 48.0                        | 12.2       |
| 1.84                        | 49.7                        | 14         | 140        | 1.84                 | 49.7                        | 19.6       |
| 1.81                        | 50.4                        | 6          | 042        | 1.81                 | 50.4                        | 7.7        |
| 1.69                        | 54.2                        | 4          | 240        | 1.68                 | 54.3                        | 4.7        |
| 1.65                        | 55.7                        | 3          | 226        | 1.65                 | 55.7                        | 4.2        |
| 1.63                        | 56.3                        | 8          | 242        | 1.63                 | 56.3                        | 8.1        |
| 1.62                        | 56.7                        | 6          | 044        | 1.62                 | 56.7                        | 5.4        |
| 1.59                        | 58.2                        | 3          | 144        |                      |                             |            |
| 1.57                        | 58.7                        | 3          | 316        | 1.57                 | 58.7                        | 3.7        |
| 1.45                        | 64.1                        | 4          | 208        | 1.45                 | 66.1                        | 4.0        |
| 1.41                        | 66.5                        | 3          | 250        | 1.41                 | 66.5                        | 2.9        |
| 1.34                        | 70.4                        | 3          | 038        | 1.36                 | 69.2                        | 3.4        |

\*Data compiled from ref. 21.

**Fig A.** Fourier-Transform (FT) IR spectroscopy

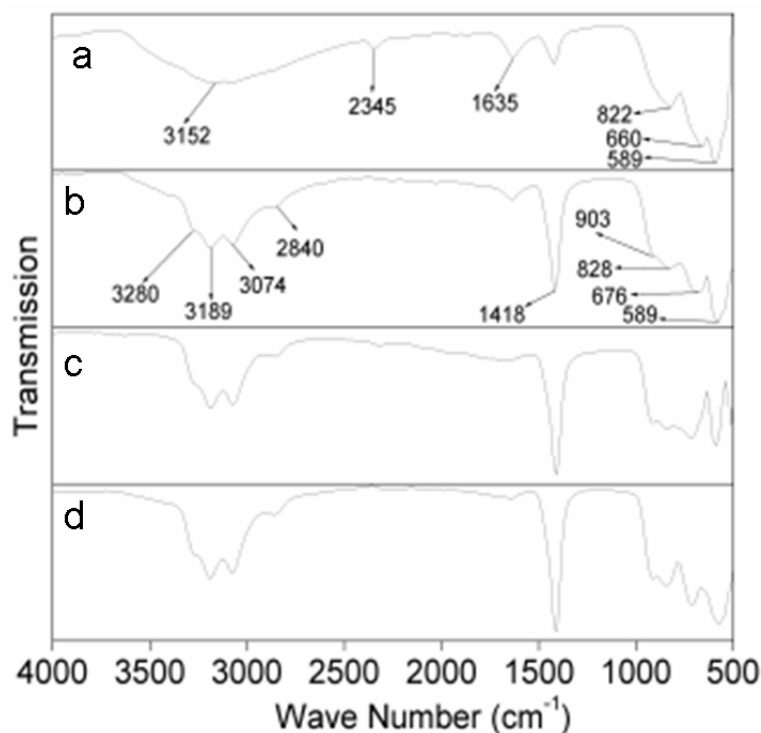

FT-IR spectra shown above provides further evidence for formation of  $\text{NH}_4\text{TiOF}_3$  from baths containing non-ionic polyoxyethylene surfactants (Brij 56, 58 and 70),  $(\text{NH}_4)_2\text{TiF}_6$  and  $\text{H}_3\text{BO}_3$ . *a.*  $\text{TiO}_2$  (anatase) formed in absence of organic surfactants *b.* As-prepared sample using B56 *c.* B58 and *d.* B70. Peak assignments are taken from ref 21. No IR vibrational modes attributed to surfactants were obtained in FT-IR spectra from samples. The peak at  $589\text{ cm}^{-1}$  is attributed to the  $\nu(\text{Ti-F})$  modes associated with layered octahedral in  $\text{NH}_4\text{TiOF}_3$ . The band at  $903\text{ cm}^{-1}$  is indicative of terminal oxygen ( $\nu(\text{Ti=O})$  mode). Modes for  $\text{NH}_4^+$  are represented at  $1418\text{ cm}^{-1}$  ( $\nu_4$ ),  $3074\text{ cm}^{-1}$ ,  $\nu_1$  (or  $\nu_2 + \nu_4$ ) and  $3189\text{ cm}^{-1}$  ( $\nu_3$ ) respectively. The band at  $2840\text{ cm}^{-1}$  is an overtone ( $2\nu_4$ ) of the bending vibration of  $\text{NH}_4^+$ . Due to their hydroscopic nature, samples are expected to exhibit features associated with absorbed water (deformation bands at  $1635$  and  $3280\text{ cm}^{-1}$ ). The general broad IR absorption seen in *a.* in the  $3600\text{--}2800\text{ cm}^{-1}$  range, with a maximum at  $3152\text{ cm}^{-1}$ , arises from the superposition of the  $\nu(\text{O-H})$  mode of molecular water coordinated to  $\text{Ti}^{4+}$  cations.

**Fig. B** XRD patterns of samples prepared in presence of 23.1 wt% Brij 58 at 35 °C for 20 hours and thereafter topotactically converted to anatase, *via* sintering at 450 °C for 2 hours or H<sub>3</sub>BO<sub>3</sub> washing.

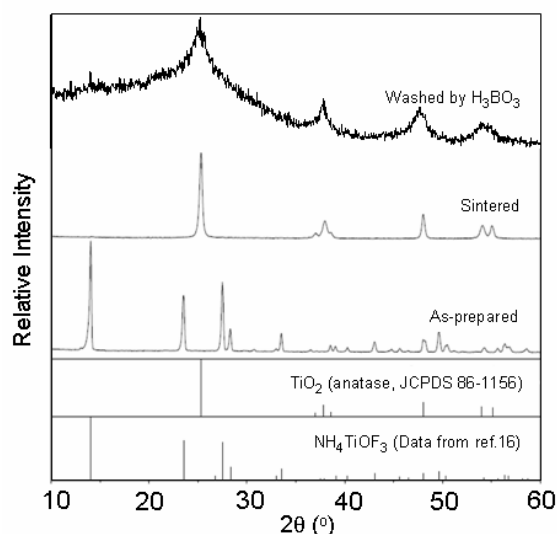

**Fig C.** Thermogravimetric analysis (TGA)

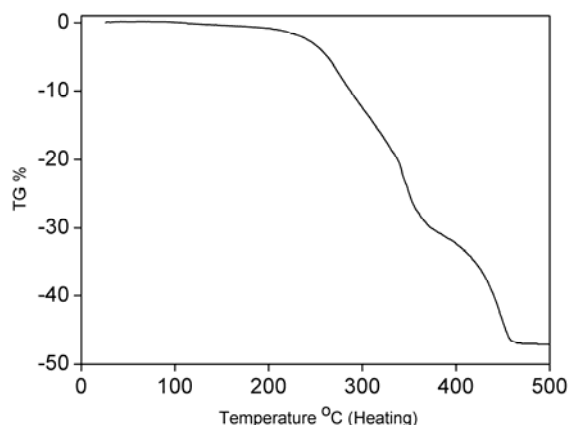

TGA of as-prepared material (using Brij 58) indicates there is about 47 % mass loss through heating to 450 °C (*cf.* predicated value of 40 % for the conversion of 95.5% anhydrous NH<sub>4</sub>TiOF<sub>3</sub> to TiO<sub>2</sub>). As described in main text, we ascribe the difference to chemisorbed water/minority impurities within pores of the as-synthesized mesocrystals. Above 450 °C no mass loss was detected. Analysis of the TGA trace and associated mass changes *cf.* as-prepared material (47%) suggests existing of the following possible intermediate materials:

1. NH<sub>4</sub>TiOF<sub>3</sub> (25 – 245.7 °C, ~1.4% mass loss associated with physisorbed water)
2. HTiOF<sub>3</sub> (245.7 – 309.8 °C, ~12.3% mass loss consistent with loss of NH<sub>3</sub>).

3.  $\text{TiOF}_2$  (309.8 – 361.2 °C, ~14.6% mass loss suggests loss of HF at this stage)
4.  $\text{TiOF}_2$  (361.2 – 424.0 °C, ~5.5% mass loss. This feature appears to be associated with loss of volatile boron-containing species as elemental analysis of initial material shows B ~1 wt%; no B is detected beyond this stage 4. Obvious candidates include  $\text{H}_3\text{BO}_3$  and/or  $\text{NH}_4\text{BF}_4$ , however FT-IR measurements have been unable to detect such species.
5. Formation of  $\text{TiO}_2$  (424.0 – 457.6 °C, ~12.6% mass loss to yield final product  $\text{TiO}_2$ ).
